# Supplementary material for: Role of intraflagellar transport protein IFT140 in the formation and function of motile cilia in mammals
Source: Springer Nature journal article supplement (doi:10.1007/s00018-025-05710-z), 2025-05-10
Supplement: MOESM2 [file 18_2025_5710_MOESM2_ESM.pdf]

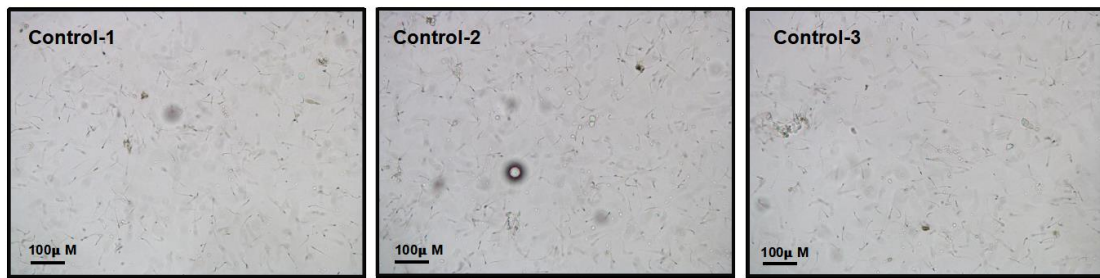

**Supplemental movie 1. Representative movies of sperm from control mice.**

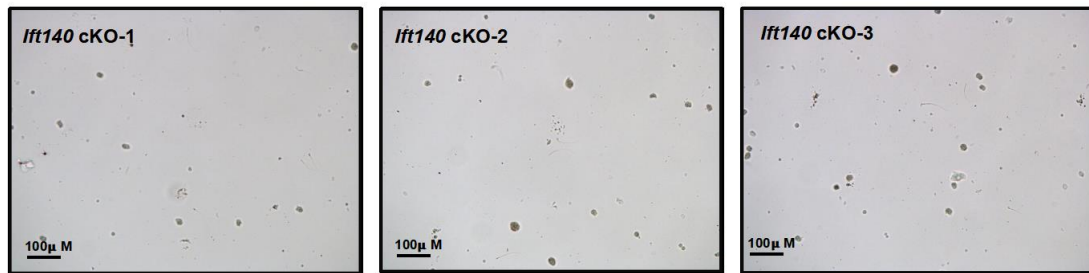

**Supplemental movie 2. Representative movies of sperm from *Ift140* cKO mice.**

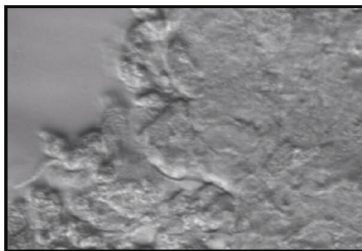

**Supplemental movie 3. Representative movies of ciliary beating in tracheal epithelial cell cultures from a control mouse.**

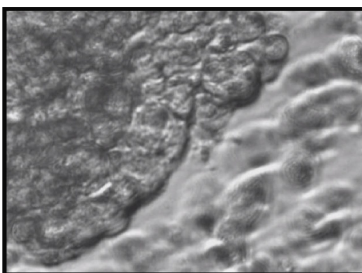

**Supplemental movie 4. Representative movies of ciliary beating in tracheal epithelial cell cultures from an *Ift140* cKO mouse.**

*Irf140* forward: 5'- TCAGCCCTCTATGCCACTCT -3'  
*Irf140* reverse: 5'- CTTCCCTATGCCTTCAGCAG-3'

*FOXJ1*-Cre forward: 5'-GCAAAACAGGTAGTTATTCGG-3',  
*FOXJ1*-Cre reverse: 5'-ATTTGGGCCAGCTAAACATGC-3'

**Supplemental Table 1: Primers for genotyping the mice.**
